determining cardiac arrest by emergency medical dispatchers. *Ann Emerg Med* 1994; 23:1022-6

31. Papastamelos C, Panitch HB, England SE, Allen JL: Developmental changes in chest wall compliance in infancy and early childhood. *J Appl Physiol* 1995; 78:179-84
32. Walsh JH, Maddison KJ, Platt PR, Hillman DR, Eastwood PR:

Influence of head extension, flexion, and rotation on collapsibility of the passive upper airway. *Sleep* 2008; 31: 1440-7

33. Min YG, Jung HW, Kim CS: Prevalence study of nasal septal deformities in Korea: Results of a nation-wide survey. *Rhinology* 1995; 33:61-5

## ANESTHESIOLOGY REFLECTIONS

### Belskie's 1971 Medallion of John Snow

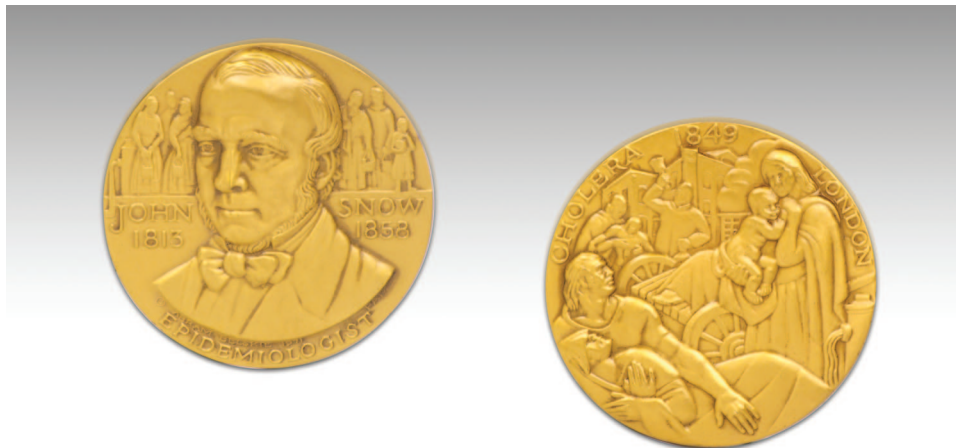

The chloroformist to Queen Victoria for the 1853 and 1857 childbirths of, respectively, Prince Leopold and Princess Beatrice, Dr. John Snow (1813-1858) is widely celebrated as the “Father of Epidemiology.” Snow’s research helped London combat the waves of cholera which swept the city (*right*). Sadly, a brain hemorrhage felled John Snow at 45 years of age. Had Snow lived to face Abram Belskie (1907-1988), the sculptor who would capture the physician’s likeness for the Presidential Art Medal “Great Men of Medicine Series” (*left*), Snow would have met a forensic pioneer in the art of reconstructing facial features from skeletal remains. (Copyright © the American Society of Anesthesiologists, Inc. This image also appears in the *Anesthesiology Reflections* online collection available at [www.anesthesiology.org](http://www.anesthesiology.org).)

George S. Bause, M.D., M.P.H., Honorary Curator, ASA’s Wood Library-Museum of Anesthesiology, Park Ridge, Illinois, and Clinical Associate Professor, Case Western Reserve University, Cleveland, Ohio. [UJYC@aol.com](mailto:UJYC@aol.com).
